# Supplementary material
Source: Springer Nature journal article supplement (https://www.springermedizin.de/resource/supplementary/12874_2013_1059_MOESM1_ESM.pdf/9433454)

Identification

Records identified through  
electronic database and Google  
Scholar searching  
(n = 8497)

Additional records identified  
through manual searches  
(n = 36)

Records after duplicates removed  
(n = 4079)

Screening

Records included after title and abstract  
screened  
(n = 359)

Records excluded after  
initial screening of title  
and abstracts  
(n = 3720)<sup>a</sup>

Eligibility

Full-text articles assessed  
for eligibility  
(n = 267)

Included

Studies included:  
Primary source articles (n =  
116) and  
Reviews (n = 31)

Full-text articles excluded  
(n = 92)<sup>b</sup>

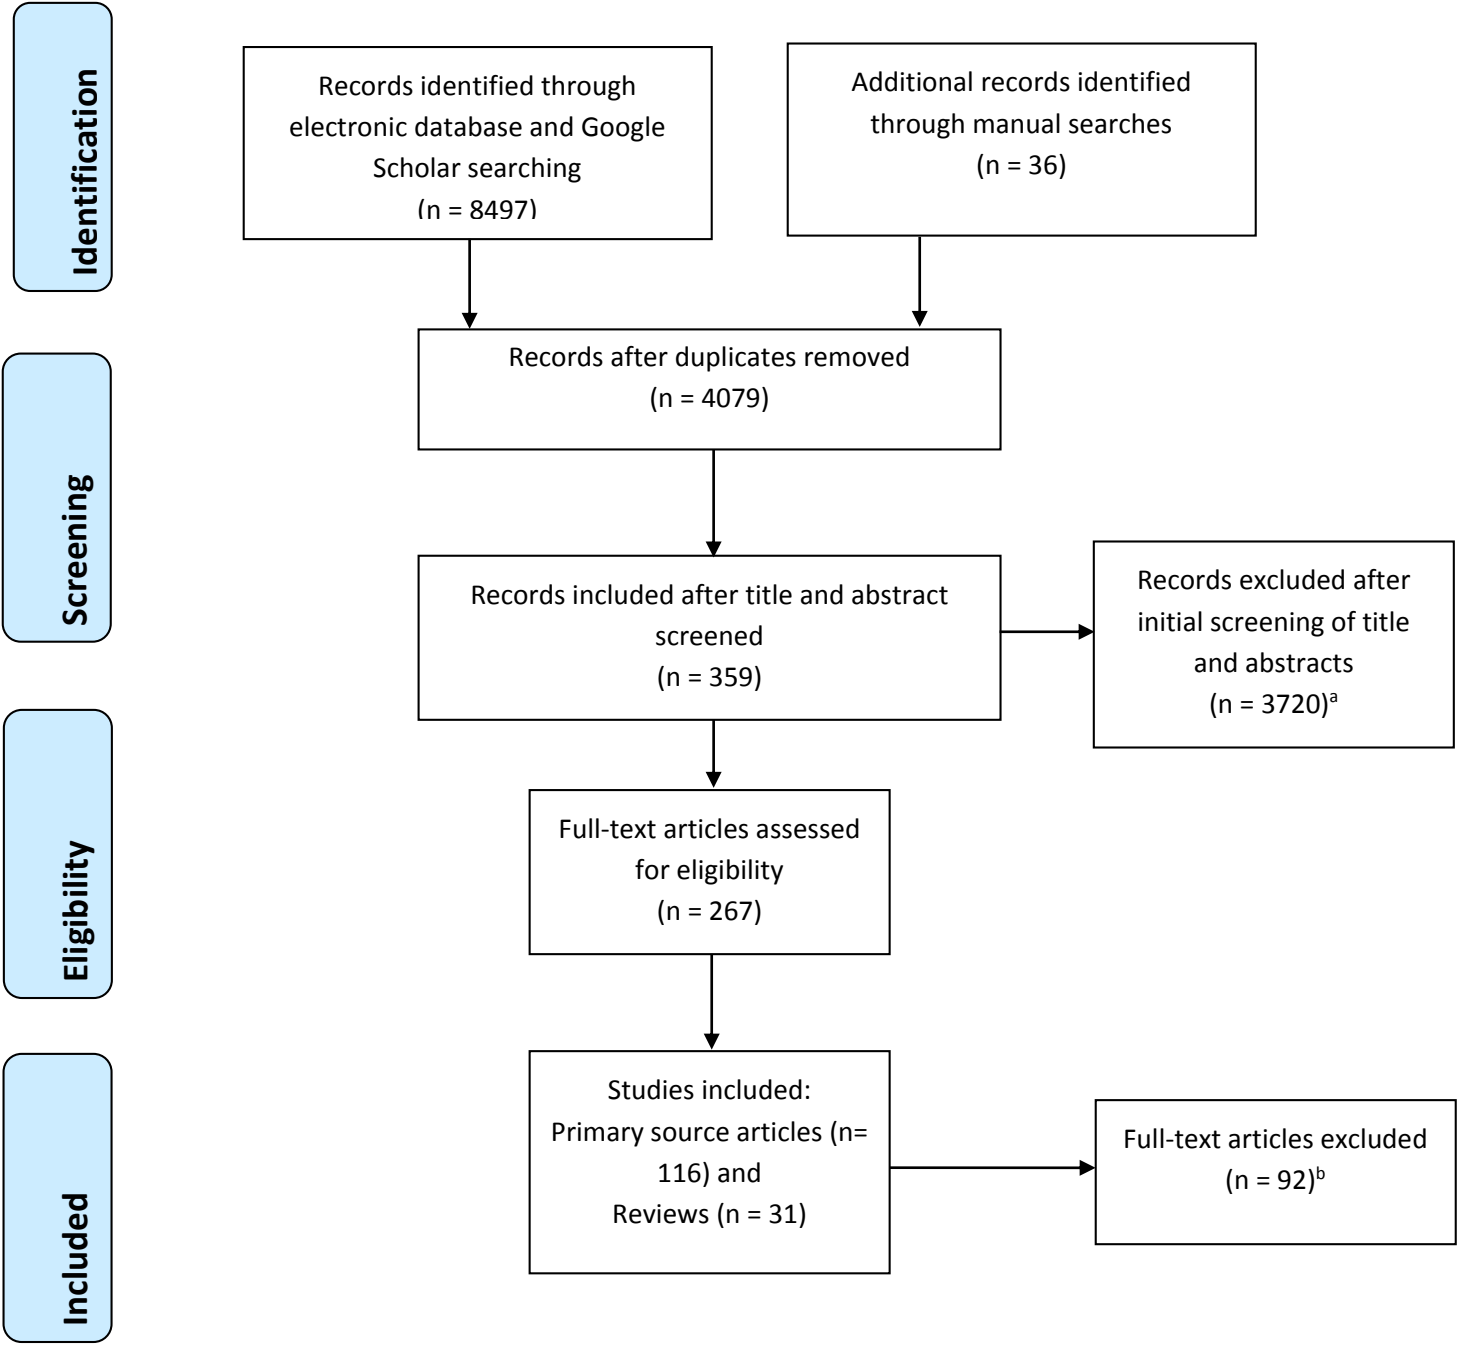

Supplement: MOESM1 [file 9433454]
